# Supplementary material for: Groundwater discharge impacts marine isotope budgets of Li, Mg, Ca, Sr, and Ba
Source: PubMed Central journal article supplement (PMC7794541; doi:10.1038/s41467-020-20248-3), 2021-01-08
Supplement: 41467_2020_20248_MOESM1_ESM.pdf [file 41467_2020_20248_MOESM1_ESM.pdf]

Supplementary Information for

‘Groundwater Discharge Impacts Marine Isotope Budgets of Li, Mg, Ca, Sr, and Ba’

by Kimberley K. Mayfield, et al., 2020

## **Supplementary Notes**

### **Riverine Ba Flux Characterization**

Due to the novelty of the  $\delta^{138}\text{Ba}$  system, no global riverine composition had yet been constrained. To construct a first-order approximation of this value, we compiled data from the three studies for which  $\delta^{138}\text{Ba}$  was published and estimate a discharge-weighted [Ba] and  $\delta^{138}\text{Ba}$  composition of global average river discharge (Supplementary Table 1).

## **Supplementary Methods**

### **Cation Concentration Analyses**

All samples ( $n = 134$ ) were analyzed for solute concentrations at the Marine Analytical Laboratory at UCSC and a subset of these samples ( $n = 56$ ) were analyzed at Woods Hole Oceanographic Institution (WHOI) using a ThermoFinnigan ELEMENT II sector-field ICP-MS and at the Czech Geological Survey (CGS) with an Agilent 5110 ICP-optical emission spectrometer (OES). The results of this inter-lab comparison ( $n = 51$ ) yielded an agreement for all elements within 5%.

#### **a. Li Isotope Analyses**

Lithium analytical procedures and isotopic measurements were performed at the CGS using a method developed by Magna et al. (2004)<sup>20</sup>, which involves ion-exchange chromatography with BioRad<sup>TM</sup> AG-50W-X8 cation exchange resin (repeated twice), followed by Li isotope analysis using a Neptune multi-collector inductively-coupled-plasma mass spectrometer (MC-ICP-MS; Thermo Scientific<sup>TM</sup>). A sample-standard bracketing method using L-SVEC solution was utilized to determine natural Li isotopic variations in the groundwater

samples. The results of Li isotopic measurements are reported in the  $\delta$ -notation relative to the L-SVEC reference solution <sup>21</sup> and calculated as:

$$\delta^7\text{Li} (\text{‰}) = [({}^7\text{Li}/{}^6\text{Li})_{\text{sample}} / ({}^7\text{Li}/{}^6\text{Li})_{\text{L-SVEC}} - 1] \times 1000$$

Four different reference materials were repeatedly analyzed alongside samples to monitor the consistency of the entire procedure: IAPSO (OSIL seawater;  $30.85\text{‰} \pm 0.18$ ;  $n = 4$ ), NASS-6 (seawater; NIST) ( $30.78\text{‰} \pm 0.08$ ;  $n = 3$ ), NIST 1640a (river water; NIST) ( $16.76\text{‰} \pm 0.08$ ;  $n = 4$ ), and SLRS-5 (river water; NRC) ( $23.58\text{‰} \pm 0.33$ ;  $n = 3$ ), where the uncertainty represents 2SD. The resultant  $\delta^7\text{Li}$  values for the standards fell within the range of previously published values available on GeoRem <sup>22</sup> and their reproducibility between runs ( $\pm \leq 0.33\text{‰}$ ; 2SD) was approximately equal to the uncertainty associated with their individual analyses ( $0.07 - 0.54\text{‰}$ ). All analytical results for the  $\delta^7\text{Li}$  composition of groundwater samples are in the Supplementary Data Tables section.

### **b. Mg Isotope Analyses**

Magnesium isotopic compositions were measured at Princeton University using a method developed by Blättler et al. (2015) <sup>23</sup>, which involves automated, high pressure ion-exchange chromatography with a Dionex ICS-5000+ IC system, coupled with a Dionex AS-AP fraction collector, followed by Mg isotope analysis with a Neptune MC-ICP-MS (Thermo Scientific<sup>TM</sup>). A sample-standard bracketing method using DSM-3 solution <sup>24</sup> was utilized to determine natural Mg isotopic variations in the groundwater samples. The results of Mg isotopic measurements are reported in  $\delta$ -notation relative to the DSM-3 reference solution and calculated as:

$$\delta^x\text{Mg} (\text{‰}) = [({}^x\text{Mg}/{}^{24}\text{Mg})_{\text{sample}} / ({}^x\text{Mg}/{}^{24}\text{Mg})_{\text{DSM-3}} - 1] \times 1000$$

where the 'x' denotes 26 or 25, respectively.

To ensure that the separation procedure did not fractionate Mg, we processed standards alongside unknowns. Measured  $\delta^{25}\text{Mg}$  and  $\delta^{26}\text{Mg}$  compositions for IC-purified Cambridge-1 ( $\delta^{25}\text{Mg} = -1.35 \pm 0.10\text{‰}$ ;  $\delta^{26}\text{Mg} = -2.62 \pm 0.13\text{‰}$ ;  $2\sigma$ ,  $n=13$ ) and Bermuda seawater ( $\delta^{25}\text{Mg} = -0.45 \pm 0.09\text{‰}$ ;  $\delta^{26}\text{Mg} = -0.84 \pm 0.12\text{‰}$ ;  $2\sigma$ ,  $n=13$ ) standards are indistinguishable from published values<sup>24</sup>, attesting to the efficacy of our chemical purification protocol.

Measured  $\delta^{26}\text{Mg}$  and  $\delta^{25}\text{Mg}$  were plotted (Supplementary Figure 2) and the trendline slope (0.532) was compared to previous studies<sup>25</sup> to ensure mass-dependent behavior of Mg isotope fractionation in this sample set. The slope in Supplementary Figure 2 is within analytical uncertainty of that published in Higgins & Schrag, 2010<sup>25</sup>, which was  $0.527 \pm 0.009$ . All analytical results for the  $\delta^{26}\text{Mg}$  composition of groundwater samples are provided in Supplementary Data Tables. For replicated samples (chemical purification + mass spectrometry), we report the  $2\sigma$  error on the sample average; otherwise, reported errors correspond to long-term external precision on the Cambridge-1 standard at Princeton ( $0.09\text{‰}$ ,  $2\sigma$ ,  $n=79$ ; Blattler et al., 2015).

### **c. Ca Isotope Analyses**

Calcium isotopic compositions were measured at GEOMAR Helmholtz Center for Ocean Research (Kiel, GER). Chemical separation of Ca from the matrix was conducted using an automated, commercially-available PrepFAST MC (ESI, Omaha, NE, USA) according to the method developed by Romaniello et al., (2015)<sup>26</sup>. The  $\delta^{44/42}\text{Ca}$  analyses were conducted on a Neptune<sup>TM</sup> MC-ICP-MS (Thermo Scientific<sup>TM</sup>) with a method adapted from Eisenhauer et al. (2019)<sup>27</sup>, which utilizes a sample-standard bracketing technique using SRM-915a solution<sup>28</sup> to determine natural Ca isotopic variations. The results of Ca isotopic measurements are reported in  $\delta$ -notation relative to the SRM-915a reference solution and calculated as:

$$\delta^{44/42}\text{Ca} (\text{‰}) = [({}^{44/42}\text{Ca}/{}^{44/42}\text{Ca})_{\text{sample}} / ({}^{44/42}\text{Ca}/{}^{44/42}\text{Ca})_{\text{SRM-915a}} - 1] \times 1000$$

Three different reference materials were separated and analyzed alongside samples to monitor the consistency of the entire procedure: IAPSO (seawater; OSIL), SRM-915b (calcium carbonate; NIST), and SRM-1486 (bone meal; NIST). The resultant  $\delta^{44/42}\text{Ca}$  values (+0.90‰, +0.35‰, and -0.50‰, respectively) are in good agreement with previously published values available on GeoRem<sup>22</sup> and their long-term reproducibility ( $\pm 2\text{SD}$ ) is equal to 0.08‰ (IAPSO,  $n = 135$ ), 0.10‰ (SRM-915b,  $n = 15$ ), and 0.05‰ (SRM-1486,  $n = 172$ ). All analytical results for the  $\delta^{44/42}\text{Ca}$  composition of groundwater samples are provided in the Supplementary Data Tables section. For ease of comparison with other previously published datasets, a conversion calculation to  $\delta^{44/40}\text{Ca}$  is provided in Table 1 of the manuscript. This conversion factor is from Gussone et al., 2016<sup>29</sup> which assumes a kinetic fractionation coefficient of 2.05, where  $\delta^{44/40}\text{Ca} = \delta^{44/42}\text{Ca} \times 2.05$ .

#### d. Sr Isotope Analyses

Groundwater Sr isotopic compositions were measured at GEOMAR Helmholtz Center for Ocean Research (Kiel, GER) using a method developed by Krabbenhöft et al. (2009)<sup>30</sup>, which involves the chemical separation of every sample twice, once ‘spiked’ using a custom double spike and once ‘unspiked.’ Ion-exchange chromatography was conducted using Eichrom Sr Spec resin in BioRad<sup>TM</sup> micro bio-spin<sup>TM</sup> columns, followed by Sr ( $\delta^{88/86}\text{Sr}$  and  ${}^{87}\text{Sr}/{}^{86}\text{Sr}$ ) isotope analysis using a TRITON thermal ionization mass spectrometer (TIMS) (ThermoFisher, Bremen, Germany). The results of the  $\delta^{88/86}\text{Sr}$  measurements are reported in  $\delta$ -notation relative to the SRM-987 reference standard and calculated as:

$$\delta^{88/86}\text{Sr} (\text{‰}) = [({}^{88}\text{Sr}/{}^{86}\text{Sr})_{\text{sample}} / ({}^{88}\text{Sr}/{}^{86}\text{Sr})_{\text{SRM-987}} - 1] \times 1000$$

To correct for session-to-session variations in isotopic ratios, 3 ‘spiked’ and 2 ‘unspiked’ SRM-987 analyses were conducted during each session – alongside every 8 samples. The average measured value of these SRM-987 analyses were compared to their accepted values ( $^{88/86}\text{Sr} = 8.375209$ ,  $\delta^{88/86}\text{Sr} = 0$ , and  $^{87}\text{Sr}/^{86}\text{Sr} = 0.710240$ ) to calculate a correction factor for the session. This correction factor was applied to each sample, resulting in session-corrected values. Reported in Krabbenhoft et al. (2009)<sup>30</sup>, the long-term  $\delta^{88/86}\text{Sr}$  reproducibility of SRM-987 with this method and instrumentation is  $0.012 \pm 0.044$  (2sd). All analytical results for the  $\delta^{88/86}\text{Sr}$  and  $^{87}\text{Sr}/^{86}\text{Sr}$  composition of groundwater samples are provided in the Supplementary Data Tables section.

#### **e. Ba Isotope Analyses**

Groundwater samples were prepared and measured for their Ba isotopic compositions at the NIRVANA Labs at WHOI using the method described by Bates et al. (2017)<sup>31</sup>. Samples were spiked with an appropriate quantity of  $^{135}\text{Ba}$ – $^{136}\text{Ba}$  double spike so as to achieve a spike- to sample-derived Ba molar ratio of between 1–2. Samples with salinity  $>5$  were co-precipitated with  $\text{CaCO}_3$  via dropwise addition of Ba-free 1 M  $\text{Na}_2\text{CO}_3$  solution, dissolved in 6 M HCl and reconstituted in 250  $\mu\text{L}$  of 2 M HCl. Samples with salinity  $< 5$  were evaporated and reconstituted in 250  $\mu\text{L}$  of 2 M HCl. Reconstituted samples were twice passed through columns containing 500  $\mu\text{L}$  of AG 50W-X8 resin; matrix elution used 2 M HCl, while Ba was eluted (and REE retained) with 2 M  $\text{HNO}_3$ . The resin was discarded after use. Purified samples were reconstituted in 0.5 M  $\text{HNO}_3$  to achieve a sample-derived [Ba] of  $\approx 20 \text{ ng mL}^{-1}$ .

Analyses were conducted at the WHOI Plasma Facility using a ThermoFinnigan Neptune MC-ICP-MS, operated in low resolution mode. Samples were aspirated, desolvated, and introduced into the mass spectrometer using a PFA nebulizer (at a rate of  $\approx 140 \mu\text{L min}^{-1}$ ),

CETAC Aridus II, and as an aerosol in  $\sim 1$  L Ar  $\text{min}^{-1}$  containing  $3\text{--}5$  mL  $\text{min}^{-1}$  admixed  $\text{N}_2$ , respectively. Samples were analyzed in  $30\text{--}40 \times \approx 4.2$  s integrations a minimum of two times, up to a maximum of eight. Spiked aliquots of NIST SRM 3104a were measured every fifth analysis; the spike-to-sample ratio of NIST SRM 3104a was adjusted to match bracketing samples and isotopic data reported relative to the nearest four bracketing standards using the  $\delta$  notation:

$$\delta^{138/134}\text{Ba} (\text{‰}) = \left[ \left( \frac{{}^{138}\text{Ba}/{}^{134}\text{Ba}}{\text{sample}} \right) / \left( \frac{{}^{138}\text{Ba}/{}^{134}\text{Ba}}{\text{NIST SRM-3104a}} - 1 \right) \right].$$

Results for groundwater samples are provided in the section for Supplementary Data Tables. Analytical precision is reported as the greater of either the long-term 2 SD reproducibility ( $\pm 0.03$  ‰; Horner et al., 2015) or the measured 2 SE obtained from replicate analyses (i.e., where  $n$  was between 2–8). Accuracy was monitored by processing four aliquots of GEOTRACES SAFe D1 alongside sample unknowns; two aliquots were processed from bottle #591 and two from #596, yielding mean [Ba] and  $\delta^{138}\text{Ba}$  of  $99.0 \pm 2.5$  nmol  $\text{kg}^{-1}$  and  $+0.33 \pm 0.03$  ‰, and  $99.4 \pm 2.5$  nmol  $\text{kg}^{-1}$  and  $+0.33 \pm 0.03$  ‰, respectively. Results from both bottles are in agreement with previous measurements of SAFe D1 from the NIRVANA Labs ( $98.7 \pm 2.5$  nmol  $\text{kg}^{-1}$  and  $+0.31 \pm 0.03$  ‰; Geyman et al., 2019) and elsewhere ( $99.6$  nmol  $\text{kg}^{-1}$  and  $+0.27 \pm 0.02$  ‰; Hsieh & Henderson, 2017).

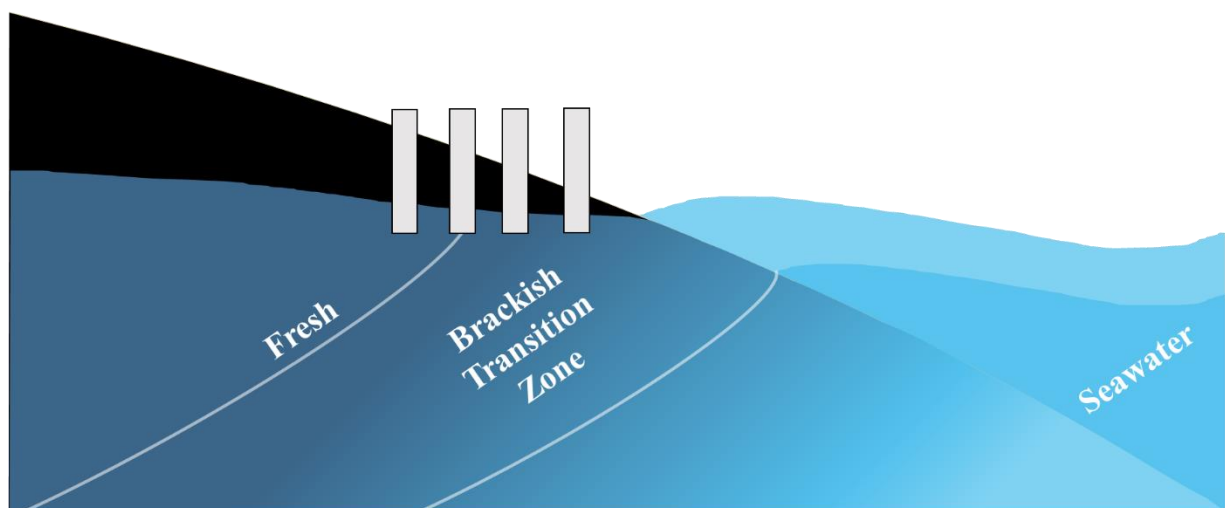

**Supplementary Figure 1.** Conceptual diagram of the subterranean estuary and sampling scheme, where grey bars represent sampling across a salinity gradient.

**Supplementary Table 1. Riverine  $\delta^{138}\text{Ba}$  compilation**

| River                          | [Ba]<br>(nM) | $\delta^{138}\text{Ba}$<br>(‰) | Discharge<br>(km <sup>3</sup> /yr) |
|--------------------------------|--------------|--------------------------------|------------------------------------|
| Changjiang                     | 432          | 0.19                           | 688.2                              |
| Amazon                         | 144          | 0.14                           | 5616                               |
| Yukon                          | 1467         | 0.16                           | 339.6                              |
| Pearl                          | 209          | 0.17                           | 336                                |
| Sepik                          | 48           | 0.25                           | 119                                |
| Danube                         | 248          | 0.13                           | 71.6                               |
| Lena                           | 90           | 0.32                           | 525                                |
| Colorado                       | 1049         | 0.3                            | 15.4                               |
| Yellow River                   | 1400         | 0.27                           | 23.2                               |
| Rio De Plata                   | 206          | 0.05                           | 473.2                              |
| Discharge weighted<br>average: | 246          | 0.16                           | -                                  |



| <b>Supplementary Table 2.</b>                             | <b>Aquifer type, global riverine, and global groundwater chemical composition</b>                 |                     |                                     |
|-----------------------------------------------------------|---------------------------------------------------------------------------------------------------|---------------------|-------------------------------------|
| <b>Aquifer (this study)</b>                               | <b>Geology</b>                                                                                    | <b>Aquifer Type</b> | <b>Associated Reference</b>         |
| Veraguas Province, Panama                                 | Extrusive volcanics                                                                               | Extrusive igneous   | Beck et al., 2013 <sup>1</sup>      |
| Hawai'i Island, HI, USA                                   | Modern basalt (<1 Ma)                                                                             | Extrusive igneous   | Knee et al., 2010 <sup>2</sup>      |
| Oahu, HI, USA                                             | Quaternary basalt (<2 Ma)                                                                         | Extrusive igneous   | Mayfield, 2013 <sup>3</sup>         |
| Maui, HI, USA                                             | Quaternary basalt (<2 Ma)                                                                         | Extrusive igneous   | Bishop et al., 2015 <sup>4</sup>    |
| Moorea, French Polynesia                                  | 1.5 - 2.0 Ma volcanics                                                                            | Extrusive igneous   | Knee et al., 2016 <sup>5</sup>      |
| Flic-en-Flac Lagoon, Mauritius                            | < 2 Ma basalt                                                                                     | Extrusive igneous   | Povinec et al., 2012 <sup>6</sup>   |
| Puerto Morelos, Yucatan, Mexico                           | Holocene (<12 ka) karstic limestone                                                               | Carbonate           | Null et al., 2014 <sup>7</sup>      |
| Cape Coral, FL, USA                                       | Pleistocene-Holocene sediments (<2 Ma)                                                            | Carbonate           | Liu et al., 2014 <sup>8</sup>       |
| Rottneest Island, Australia                               | Pleistocene-Holocene limestone (<2 Ma)                                                            | Carbonate           | Bryan et al., 2016 <sup>9</sup>     |
| Venice Lagoon, Venice, Italy                              | Modern carbonates                                                                                 | Carbonate           | Rapaglia et al., 2010 <sup>10</sup> |
| *Everglades, FL, USA                                      | Modern carbonates with some evaporites                                                            | Carbonate           | Holmden et al., 2010 <sup>11</sup>  |
| *Carbonate GROUNDWATER average (Florida, Yucatan average) | Modern carbonates with some evaporites                                                            | Carbonate           | Holmden et al., 2010 <sup>11</sup>  |
| Waquoit Bay, MA, USA                                      | Granitic Glacial Till                                                                             | Intrusive Igneous   | Liu et al., 2017 <sup>8</sup>       |
| Great South Bay, NY, USA                                  | Granitic Glacial Till                                                                             | Intrusive Igneous   | Beck et al., 2007 <sup>12</sup>     |
| Monterey, CA, USA                                         | Mesozoic granites (~180 Ma) and Cenozoic (<66 Ma) sediments                                       | Intrusive Igneous   | Lecher et al., 2016 <sup>13</sup>   |
| Kasitsna Bay, AK, USA                                     | Mesozoic metamorphic, volcanic, and igneous intrusive rocks                                       | Intrusive Igneous   | Lecher et al., 2015 <sup>14</sup>   |
| Eilat, Israel                                             | Late Precambrian igneous and metamorphics (630 Ma granite, 790 Ma gneiss, 807 Ma Schists)         | Intrusive Igneous   | This Study                          |
| *Bay of Bengal, Bangladesh                                | Igneous granites and gneisses                                                                     | Intrusive Igneous   | Beck et al., 2013 <sup>1</sup>      |
| *Pamet River, MA, USA                                     | Granitic Glacial Till                                                                             | Intrusive Igneous   | Beck et al., 2013 <sup>1</sup>      |
| *Staten Island, NY, USA                                   | Granitic Glacial Till                                                                             | Intrusive Igneous   | Hogan and Blum, 2003 <sup>15</sup>  |
| Seabright, CA, USA                                        | Quaternary Sediments (<2.5 Ma)                                                                    | Sedimentary         | Lecher et al., 2016 <sup>13</sup>   |
| Angel Island, CA, USA                                     | Altered Graywacke (~100 Ma)                                                                       | Sedimentary         | Null et al., 2012 <sup>16</sup>     |
| St Lucia, South Africa                                    | Mesozoic extrusive volcanics (~180 Ma) and Cretaceous (145-65 Ma) Sandstone                       | Sedimentary         | Moore et al., 2019 <sup>17</sup>    |
| Coffs Harbour, Australia                                  | Lower Permian base rock (slate, schistose sandstone/conglomerate, 250 - 298 Ma) with modern sands | Sedimentary         | Tucker et al., 2019 <sup>18</sup>   |
| Patos Lagoon, Brazil                                      | Pleistocene and Holocene (<2 Ma) sandy cap on an alluvial fan on Precambrian shield               | Sedimentary         | Windom et al., 2003 <sup>19</sup>   |

\*Sampling sites for which only historical data is provided - no new analyses were conducted for this study. Associated reference refers to the study in which the data utilized were published

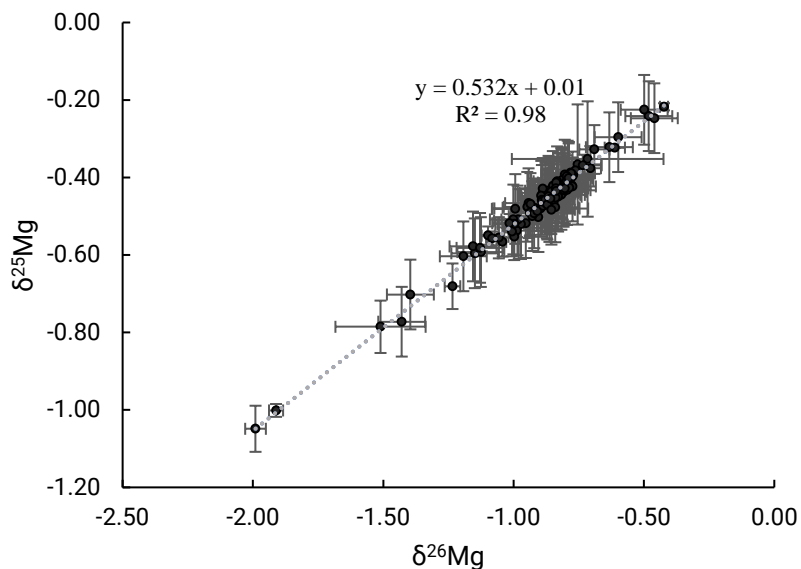

**Supplementary Figure 2.** Three isotope plot ( $\delta^{26}\text{Mg}$  vs  $\delta^{25}\text{Mg}$ ) for all samples measured in this study. Error bars represent 2 standard deviations of the sample average or long-term external precision on the Cambridge-1 standard at Princeton.

## Supplementary Data Tables

**Supplementary Table 3.** | All concentration data collected as a part of this study.

| Sample ID      | Location | Lithologic<br>'Aquifer Type' | Salinity | [Li]<br>$\mu\text{g L}^{-1}$ | [Mg]<br>$\text{g L}^{-1}$ | [Ca]<br>$\text{g L}^{-1}$ | [Sr]<br>$\text{mg L}^{-1}$ | [Ba]<br>$\mu\text{g L}^{-1}$ |
|----------------|----------|------------------------------|----------|------------------------------|---------------------------|---------------------------|----------------------------|------------------------------|
| HBM4           | Maui, HI | Extrusive Igneous            | 33.9     | 166                          | 1.14                      | 0.39                      | 7.5                        | 43                           |
| HBSP3          | Maui, HI | Extrusive Igneous            | 3.5      | 16                           | 0.07                      | 0.03                      | 0.4                        | 1                            |
| Honokowai Well | Maui, HI | Extrusive Igneous            | 0.0      | 2                            | 0.02                      | 0.02                      | 0.2                        | 4                            |
| HONW           | Maui, HI | Extrusive Igneous            | 0.1      | 0.31                         | 0.01                      | 0.01                      | 0.1                        | 1                            |
| KaBpiez1       | Oahu, HI | Extrusive Igneous            | 24.2     | 112                          | 0.93                      | 0.31                      | 5.9                        | 10                           |
| KaBpiez2       | Oahu, HI | Extrusive Igneous            | 27.5     | 137                          | 0.94                      | 0.31                      | 5.9                        | 7                            |
| KaBpiez3       | Oahu, HI | Extrusive Igneous            | 27.6     | 141                          | 0.89                      | 0.27                      | 5.5                        | 7                            |
| KaBspring1     | Oahu, HI | Extrusive Igneous            | 1.3      | 4                            | 0.04                      | 0.04                      | 0.4                        | 10                           |
| KaBWell        | Oahu, HI | Extrusive Igneous            | 0.0      | 0.05                         | 0.01                      | 0.02                      | 0.1                        | 2                            |
| KONA_104       | Kona, HI | Extrusive Igneous            | 24.8     | 136                          | 0.95                      | 0.31                      | 5.8                        | 16                           |
| KONA_300       | Kona, HI | Extrusive Igneous            | 13.4     | 60                           | 0.50                      | 0.17                      | 3.1                        | 8                            |

|                |                                  |                   |      |     |      |      |     |     |
|----------------|----------------------------------|-------------------|------|-----|------|------|-----|-----|
| KONA_85        | Kona, HI                         | Extrusive Igneous | 24.1 | 143 | 0.91 | 0.28 | 5.4 | 12  |
| KONA_92        | Kona, HI                         | Extrusive Igneous | 14.0 | 86  | 0.58 | 0.19 | 3.6 | 10  |
| KONA_93        | Kona, HI                         | Extrusive Igneous | 14.0 | 73  | 0.52 | 0.18 | 3.3 | 9   |
| M1             | Mauritius                        | Extrusive Igneous | 4.2  | 18  | 0.14 | 0.09 | 1.2 | 4   |
| M13            | Mauritius                        | Extrusive Igneous | 8.3  | 46  | 0.27 | 0.13 | 2.0 | 2   |
| M21            | Mauritius                        | Extrusive Igneous | 35.7 | 180 | 1.21 | 0.40 | 8.2 | 5   |
| M22 3/24       | Mauritius                        | Extrusive Igneous | 34.9 | 168 | 1.19 | 0.41 | 8.3 | 6   |
| M22 3/25       | Mauritius                        | Extrusive Igneous | 31.9 | 157 | 1.09 | 0.41 | 7.9 | 8   |
| M24 3/24       | Mauritius                        | Extrusive Igneous | 32.3 | 152 | 1.10 | 0.38 | 7.3 | 8   |
| M26 3/24       | Mauritius                        | Extrusive Igneous | 32.3 | 153 | 1.11 | 0.37 | 7.3 | 6   |
| M4             | Mauritius                        | Extrusive Igneous | 36.8 | 173 | 1.24 | 0.43 | 8.5 | 8   |
| M5             | Mauritius                        | Extrusive Igneous | 36.8 | 169 | 1.25 | 0.43 | 8.6 | 8   |
| M6             | Mauritius                        | Extrusive Igneous | 5.4  | 28  | 0.17 | 0.10 | 1.3 | 5   |
| M9             | Mauritius                        | Extrusive Igneous | 36.2 | 165 | 1.22 | 0.42 | 8.3 | 6   |
| Th_12          | Moorea, French Polynesia         | Extrusive Igneous | 2.8  | 43  | 0.22 | 0.13 | 2.0 | 58  |
| Th_27          | Moorea, French Polynesia         | Extrusive Igneous | 16.6 | 49  | 0.40 | 0.24 | 6.0 | 64  |
| Th_42          | Moorea, French Polynesia         | Extrusive Igneous | 15.1 |     | 0.00 | 0.00 | 0.0 |     |
| Th_47          | Moorea, French Polynesia         | Extrusive Igneous | 16.4 | 46  | 0.42 | 0.25 | 7.3 | 21  |
| Th_53          | Moorea, French Polynesia         | Extrusive Igneous | 6.0  | 60  | 0.22 | 0.13 | 2.1 | 6   |
| Th_60          | Moorea, French Polynesia         | Extrusive Igneous | 14.2 |     | 0.55 | 0.25 | 5.5 | 76  |
| Th_62          | Moorea, French Polynesia         | Extrusive Igneous | 21.9 |     | 0.81 | 0.38 | 8.5 | 6   |
| LJL227         | West Panama                      | Extrusive Igneous | 30.0 | 118 | 1.33 | 0.52 | 9.5 | 256 |
| LJL228         | West Panama                      | Extrusive Igneous | 0.5  | 5   | 0.04 | 0.02 | 0.3 | 15  |
| LJL229         | West Panama                      | Extrusive Igneous | 11.5 | 49  | 0.30 | 0.11 | 2.0 | 205 |
| LJL230         | West Panama                      | Extrusive Igneous | 1.0  | 5   | 0.02 | 0.02 | 0.1 | 2   |
| LJL250         | West Panama                      | Extrusive Igneous | 5.1  | 13  | 0.15 | 0.20 | 1.6 | 48  |
| LJL251         | West Panama                      | Extrusive Igneous | 4.2  | 11  | 0.12 | 0.15 | 1.2 | 110 |
| V Artisan Well | Venice, Italy                    | Carbonate         | 0.7  | 19  | 0.04 | 0.04 | 0.5 | 313 |
| VP02           | Venice, Italy                    | Carbonate         | 12.9 | 113 | 0.65 | 0.33 | 4.6 | 43  |
| VP05           | Venice, Italy                    | Carbonate         | 16.6 | 104 | 0.70 | 0.35 | 4.8 | 65  |
| VP07           | Venice, Italy                    | Carbonate         | 20.4 | 112 | 0.80 | 0.36 | 5.2 | 54  |
| VP3            | Venice, Italy                    | Carbonate         | 14.4 | 90  | 0.58 | 0.29 | 3.9 | 51  |
| VP4            | Venice, Italy                    | Carbonate         | 15.9 | 84  | 0.62 | 0.31 | 4.2 | 68  |
| VP-6           | Venice, Italy                    | Carbonate         | 18.9 | 111 | 0.76 | 0.37 | 5.3 | 56  |
| VP8            | Venice, Italy                    | Carbonate         | 21.3 | 128 | 0.93 | 0.43 | 6.1 | 72  |
| Rott1          | Rottneest Island, West Australia | Carbonate         | 24.4 | 110 | 0.83 | 0.34 | 0.0 | 62  |
| Rott2          | Rottneest Island, West Australia | Carbonate         | 37.9 | 184 | 1.28 | 0.43 | 8.4 | 7   |
| Rott3          | Rottneest Island, West Australia | Carbonate         | 8.0  | 65  | 0.25 | 0.19 | 0.0 | 19  |
| Rott4          | Rottneest Island, West Australia | Carbonate         | 0.3  | 4   | 0.04 | 0.05 | 2.3 | 2   |
| Rott5          | Rottneest Island, West Australia | Carbonate         | 19.0 | 74  | 0.68 | 0.34 | 5.0 | 30  |
| CAL 212        | Cape Coral, FL                   | Carbonate         | 20.4 | 21  | 0.67 | 1.27 | 9.3 | 117 |
| CAL 213        | Cape Coral, FL                   | Carbonate         | 25.9 | 36  | 0.96 | 0.67 | 8.9 | 261 |
| CAL 215        | Cape Coral, FL                   | Carbonate         | 8.3  | 49  | 0.28 | 0.15 | 2.2 | 13  |

|               |                     |                   |      |     |      |      |      |     |
|---------------|---------------------|-------------------|------|-----|------|------|------|-----|
| GW 213        | Cape Coral, FL      | Carbonate         | 0.4  | 16  | 0.03 | 0.04 | 2.1  | 14  |
| FIC_7         | Yucatan, Mexico     | Carbonate         |      | 5   | 0.32 | 0.20 | 4.4  | 26  |
| FIC_17        | Yucatan, Mexico     | Carbonate         | 0.0  | 2   | 0.14 | 0.12 | 3.2  | 51  |
| MEX_11        | Yucatan, Mexico     | Carbonate         | 39.5 | 179 | 1.34 | 0.46 | 9.5  | 19  |
| MEX_63        | Yucatan, Mexico     | Carbonate         | 30.6 | 141 | 1.04 | 0.37 | 7.1  | 10  |
| MEX_66        | Yucatan, Mexico     | Carbonate         | 42.4 | 181 | 1.42 | 0.50 | 10.2 | 22  |
| SGD Eilat     | Eilat, Israel       | Intrusive Igneous | 39.7 | 185 | 1.33 | 0.47 | 9.7  | 16  |
| MB Academy 1  | Monterey, CA        | Intrusive Igneous | 33.6 | 160 | 1.11 | 0.39 | 7.8  | 12  |
| MB Academy 5  | Monterey, CA        | Intrusive Igneous | 27.1 | 160 | 1.16 | 0.41 | 8.1  | 18  |
| MB Hopkins 10 | Monterey, CA        | Intrusive Igneous |      | 304 | 2.37 | 0.83 | 17.7 | 21  |
| MB Hopkins 11 | Monterey, CA        | Intrusive Igneous | 22.6 | 161 | 0.44 | 0.33 | 3.9  | 37  |
| MB Hopkins 15 | Monterey, CA        | Intrusive Igneous | 15.5 | 134 | 1.12 | 0.38 | 7.5  | 15  |
| MB Hopkins 16 | Monterey, CA        | Intrusive Igneous | 34.9 | 152 | 1.15 | 0.39 | 7.9  | 11  |
| MB Hopkins 18 | Monterey, CA        | Intrusive Igneous | 21.8 | 159 | 0.70 | 0.39 | 5.7  | 39  |
| MB Hopkins 19 | Monterey, CA        | Intrusive Igneous | 33.7 | 149 | 1.10 | 0.39 | 7.7  | 8   |
| MB Hopkins 39 | Monterey, CA        | Intrusive Igneous | 26.5 | 150 | 1.13 | 0.41 | 7.8  | 14  |
| WP 10-5       | Southern Brazil     | Intrusive Igneous | 26.3 | 206 | 1.34 | 0.40 | 6.4  | 13  |
| WP 12-5       | Southern Brazil     | Intrusive Igneous | 22.6 | 155 | 1.14 | 0.34 | 5.6  | 10  |
| WP 1-5        | Southern Brazil     | Intrusive Igneous | 25.8 | 166 | 1.31 | 0.39 | 5.9  | 11  |
| WP 2-5        | Southern Brazil     | Intrusive Igneous | 22.8 | 156 | 1.16 | 0.35 | 5.7  | 12  |
| WP 3-S        | Southern Brazil     | Intrusive Igneous | 24.8 | 172 | 1.25 | 0.38 | 6.0  | 11  |
| WP 5-5        | Southern Brazil     | Intrusive Igneous | 25.1 | 171 | 1.26 | 0.38 | 6.1  | 13  |
| WP 6-5        | Southern Brazil     | Intrusive Igneous | 28.1 | 201 | 1.42 | 0.44 | 6.8  | 9   |
| DT1           | Waquoit Bay, MA     | Intrusive Igneous | 0.3  | 1   | 0.01 | 0.01 | 0.1  | 1   |
| DT2           | Waquoit Bay, MA     | Intrusive Igneous | 7.6  | 40  | 0.27 | 0.11 | 1.9  | 106 |
| DT3           | Waquoit Bay, MA     | Intrusive Igneous | 10.1 | 40  | 0.41 | 0.15 | 2.7  | 55  |
| DT4           | Waquoit Bay, MA     | Intrusive Igneous | 17.8 | 76  | 0.66 | 0.22 | 4.2  | 31  |
| DT8           | Waquoit Bay, MA     | Intrusive Igneous | 25.6 | 109 | 0.95 | 0.31 | 6.2  | 44  |
| DT9           | Waquoit Bay, MA     | Intrusive Igneous | 1.6  | 8   | 0.04 | 0.02 | 0.3  | 4   |
| GSB Ba peak   | Great South Bay, NY | Intrusive Igneous | 30.7 | 113 | 1.04 | 0.35 | 7.3  | 173 |
| GSB Fresh     | Great South Bay, NY | Intrusive Igneous | 0.6  | 4   | 0.01 | 0.02 | 0.2  | 25  |
| GSB Mid       | Great South Bay, NY | Intrusive Igneous | 20.0 | 102 | 0.69 | 0.23 | 4.4  | 24  |
| GSB Mid2      | Great South Bay, NY | Intrusive Igneous | 29.5 | 140 | 0.99 | 0.32 | 6.5  | 40  |
| GSB Saline    | Great South Bay, NY | Intrusive Igneous | 31.7 | 147 | 1.08 | 0.34 | 7.0  | 17  |
| AK_102        | Kasitsna, AK        | Intrusive Igneous | 26.2 | 110 | 0.92 | 0.32 | 6.0  | 15  |
| AK_115        | Kasitsna, AK        | Intrusive Igneous | 28.9 | 162 | 1.04 | 0.35 | 6.7  | 10  |
| AK_131        | Kasitsna, AK        | Intrusive Igneous | 30.2 | 156 | 1.06 | 0.35 | 7.0  | 9   |
| AK_15         | Kasitsna, AK        | Intrusive Igneous | 27.9 | 165 | 1.07 | 0.36 | 7.0  | 8   |
| AK_38         | Kasitsna, AK        | Intrusive Igneous | 6.3  | 57  | 0.17 | 0.06 | 1.0  | 2   |
| AK_48         | Kasitsna, AK        | Intrusive Igneous | 14.5 | 74  | 0.47 | 0.16 | 2.9  | 9   |
| AK_49         | Kasitsna, AK        | Intrusive Igneous | 30.4 | 118 | 0.85 | 0.30 | 5.5  | 20  |
| AK_75         | Kasitsna, AK        | Intrusive Igneous | 28.7 | 84  | 0.39 | 0.14 | 2.4  | 8   |

|                |                   |             |      |     |      |      |     |     |
|----------------|-------------------|-------------|------|-----|------|------|-----|-----|
| Aus 1          | East Australia    | Sedimentary | 2.2  | 26  | 0.09 | 0.16 | 1.4 | 55  |
| Aus 10         | East Australia    | Sedimentary | 25.4 | 122 | 0.96 | 0.33 | 6.1 | 25  |
| Aus 11         | East Australia    | Sedimentary | 4.4  | 26  | 0.20 | 0.09 | 1.3 | 54  |
| Aus 12         | East Australia    | Sedimentary | 4.3  | 17  | 0.13 | 0.08 | 1.0 | 23  |
| Aus 13         | East Australia    | Sedimentary | 32.4 | 181 | 1.23 | 0.42 | 7.9 | 24  |
| Aus 14         | East Australia    | Sedimentary | 19.7 | 114 | 0.77 | 0.26 | 4.7 | 23  |
| Aus 15         | East Australia    | Sedimentary | 11.5 | 52  | 0.48 | 0.18 | 3.0 | 30  |
| Aus 16         | East Australia    | Sedimentary | 2.0  | 12  | 0.05 | 0.04 | 0.4 | 68  |
| Aus 17         | East Australia    | Sedimentary | 36.3 | 192 | 1.28 | 0.43 | 8.8 | 26  |
| Aus 18         | East Australia    | Sedimentary | 35.0 | 179 | 1.27 | 0.42 | 8.5 | 47  |
| Aus 2          | East Australia    | Sedimentary | 1.8  | 25  | 0.08 | 0.10 | 1.1 | 47  |
| Aus 3          | East Australia    | Sedimentary | 0.4  | 6   | 0.01 | 0.09 | 0.5 | 775 |
| Aus 4          | East Australia    | Sedimentary | 0.3  | 7   | 0.01 | 0.07 | 0.4 | 32  |
| Aus 5          | East Australia    | Sedimentary | 17.0 | 74  | 0.62 | 0.25 | 4.1 | 189 |
| Aus 6          | East Australia    | Sedimentary | 6.0  | 33  | 0.21 | 0.24 | 2.7 | 9   |
| Aus 7          | East Australia    | Sedimentary | 0.4  | 10  | 0.04 | 0.06 | 0.5 | 8   |
| Aus 8          | East Australia    | Sedimentary | 0.3  | 3   | 0.01 | 0.06 | 0.3 | 3   |
| Aus 9          | East Australia    | Sedimentary | 16.5 | 86  | 0.66 | 0.24 | 4.0 | 35  |
| MB_31          | Santa Cruz, CA    | Sedimentary | 30.7 | 178 | 1.30 | 0.43 | 8.7 | 27  |
| MB_34          | Santa Cruz, CA    | Sedimentary | 9.8  | 81  | 0.40 | 0.14 | 2.3 | 14  |
| MB_38          | Santa Cruz, CA    | Sedimentary | 33.6 | 163 | 1.25 | 0.41 | 8.3 | 12  |
| MB_56          | Santa Cruz, CA    | Sedimentary | 22.5 | 129 | 0.79 | 0.27 | 5.0 | 13  |
| MB_78          | Santa Cruz, CA    | Sedimentary | 10.2 | 80  | 0.36 | 0.12 | 2.1 | 8   |
| S.A. ocn       | South Africa      | Sedimentary | 37.0 | 170 | 1.24 | 0.41 | 8.6 | 7   |
| SA Fresh       | South Africa      | Sedimentary | 0.2  | 14  | 0.03 | 0.01 | 0.2 | 60  |
| SA SL-EM-#3    | South Africa      | Sedimentary | 8.0  | 57  | 0.29 | 0.14 | 2.1 | 26  |
| SA SL-EM-#6    | South Africa      | Sedimentary | 7.0  | 41  | 0.20 | 0.08 | 1.4 | 7   |
| SFB AI 17 5/10 | San Francisco, CA | Sedimentary | 17.6 | 100 | 0.75 | 0.23 | 3.8 | 29  |
| SFB_2          | San Francisco, CA | Sedimentary | 25.8 | 142 | 1.06 | 0.36 | 6.9 | 30  |
| SFB_22         | San Francisco, CA | Sedimentary | 22.6 | 135 | 0.94 | 0.33 | 6.4 | 22  |
| SFB_27         | San Francisco, CA | Sedimentary | 25.5 | 134 | 0.94 | 0.33 | 6.4 | 36  |
| SFB_39         | San Francisco, CA | Sedimentary | 24.4 | 125 | 0.95 | 0.33 | 6.5 | 37  |
| SFB_72         | San Francisco, CA | Sedimentary | 26.1 | 124 | 0.97 | 0.34 | 6.3 | 39  |
| SFB_85         | San Francisco, CA | Sedimentary | 9.4  | 45  | 0.24 | 0.12 | 1.7 | 21  |
| SFB17 5/10     | San Francisco, CA | Sedimentary | 17.6 | 110 | 0.73 | 0.25 | 4.6 | 30  |
| SFB361009      | San Francisco, CA | Sedimentary | 17.5 | 138 | 0.97 | 0.35 | 6.4 | 31  |
| SFBAI171009    | San Francisco, CA | Sedimentary | 17.6 | 132 | 0.93 | 0.34 | 6.2 | 33  |

**Supplementary Table 4.** | All isotope data collected as a part of this study.

| Sample ID | $\delta^7\text{Li}$ | $\pm 2 \text{ SD}$ | $\delta^{26/24}\text{Mg}$ | $\pm 2 \text{ SD}$ | $\delta^{44/42}\text{Ca}$ | $\pm 2 \text{ SD}$ | $^{87}\text{Sr}/^{86}\text{Sr}$ | $\delta^{88/86}\text{Sr}$ | $\delta^{138/134}\text{Ba}$ | $\pm 2 \text{ SD}$ |
|-----------|---------------------|--------------------|---------------------------|--------------------|---------------------------|--------------------|---------------------------------|---------------------------|-----------------------------|--------------------|
|-----------|---------------------|--------------------|---------------------------|--------------------|---------------------------|--------------------|---------------------------------|---------------------------|-----------------------------|--------------------|

|                | ‰    | ‰   | ‰     | ‰    | ‰    | ‰    | ‰       | ‰     | ‰     | ‰    |
|----------------|------|-----|-------|------|------|------|---------|-------|-------|------|
| HBM4           |      |     | -0.75 | 0.09 |      |      | 0.70931 | 0.411 |       |      |
| Hbsp3          | 29.7 | 0.2 | -0.99 | 0.05 | 0.87 | 0.07 | 0.70929 | 0.421 |       |      |
| Honokowai Well |      |     | -1.10 | 0.03 | 0.49 | 0.05 | 0.70637 | 0.317 |       |      |
| HONW           | 26.4 | 0.1 | -0.61 | 0.04 | 0.43 | 0.04 | 0.70443 | 0.319 |       |      |
| KaBpiez1       | 31.7 | 0.4 | -0.88 | 0.01 |      |      | 0.70928 | 0.421 | 0.40  | 0.04 |
| KaBpiez2       |      |     |       |      | 0.87 | 0.06 | 0.70929 | 0.434 |       |      |
| KaBpiez3       |      |     |       |      | 0.86 | 0.06 | 0.70932 | 0.432 |       |      |
| KaBspring1     |      |     | -0.86 | 0.09 | 0.55 | 0.07 | 0.70727 | 0.345 |       |      |
| KaBWell        | 31.4 | 0.3 |       |      | 0.50 | 0.03 | 0.70554 | 0.390 | 0.16  | 0.03 |
| KONA_104       |      |     | -0.77 | 0.03 | 0.99 | 0.08 |         |       | 0.08  |      |
| KONA_300       | 30.9 | 0.3 | -0.88 | 0.04 | 0.92 | 0.06 | 0.70922 | 0.353 | 0.02  |      |
| KONA_85        | 30.3 | 0.1 | -0.87 | 0.06 | 1.01 |      |         |       | 0.11  |      |
| KONA_92        |      |     | -0.85 | 0.00 | 0.88 |      |         |       | -0.03 |      |
| KONA_93        |      |     | -0.83 | 0.01 | 0.87 |      |         |       | 0.03  |      |
| M1             | 30.8 | 0.2 | -1.06 | 0.05 | 0.62 | 0.04 | 0.70901 | 0.359 | -0.18 | 0.08 |
| M13            |      |     | -0.89 | 0.01 | 0.82 | 0.09 | 0.70917 | 0.368 |       |      |
| M21            |      |     | -1.08 | 0.02 | 0.91 | 0.05 | 0.70931 | 0.398 |       |      |
| M22 3/24       |      |     | -0.98 | 0.06 | 0.89 | 0.09 | 0.70931 | 0.401 |       |      |
| M22 3/25       |      |     | -0.92 | 0.08 | 0.76 | 0.04 | 0.70930 | 0.399 |       |      |
| M24 3/24       |      |     |       |      | 0.83 | 0.10 |         |       |       |      |
| M26 3/24       |      |     | -0.90 | 0.18 | 0.84 | 0.06 | 0.70931 | 0.416 |       |      |
| M4             |      |     |       |      | 0.87 | 0.08 | 0.70933 | 0.442 |       |      |
| M5             |      |     | -0.89 | 0.09 | 0.84 | 0.10 | 0.70931 | 0.402 |       |      |
| M6             |      |     |       |      | 0.74 | 0.07 | 0.70904 | 0.335 |       |      |
| M9             | 30.0 | 0.2 | -0.94 | 0.07 | 0.82 | 0.09 | 0.70931 | 0.397 | 0.42  | 0.03 |
| Th_12          | 29.1 | 0.2 | -1.00 | 0.04 |      |      |         |       | 0.11  |      |
| Th_27          |      |     | -0.83 | 0.09 |      |      |         |       |       |      |
| Th_42          |      |     | -0.72 | 0.29 |      |      |         |       |       |      |
| Th_47          |      |     | -0.83 | 0.09 |      |      |         |       |       |      |
| Th_53          | 28.9 | 0.1 | -0.85 | 0.09 |      |      | 0.70915 | 0.385 | 0.19  |      |
| Th_60          |      |     | -1.02 | 0.07 |      |      |         |       | 0.13  |      |
| LJL227         |      |     | -0.84 | 0.02 | 0.78 | 0.05 |         |       |       |      |
| LJL228         | 27.6 | 0.1 |       |      | 0.63 | 0.08 | 0.70909 | 0.403 | 0.36  | 0.03 |
| LJL229         | 27.9 | 0.1 | -0.81 | 0.12 | 0.83 | 0.12 | 0.70908 | 0.426 | 0.33  | 0.03 |
| LJL230         |      |     | -0.71 | 0.04 |      |      |         |       |       |      |
| LJL250         |      |     | -0.77 | 0.04 |      |      | 0.70818 | 0.306 |       |      |
| LJL251         |      |     | -0.83 | 0.04 |      |      | 0.70822 | 0.313 |       |      |
| V Artisan Well | 20.7 | 0.2 | -1.43 | 0.09 | 0.50 | 0.01 | 0.70843 | 0.267 | 0.04  | 0.03 |
| VP02           |      |     |       |      | 0.73 | 0.07 | 0.70930 | 0.398 |       |      |
| VP05           |      |     | -0.79 | 0.09 | 0.80 | 0.10 | 0.70930 | 0.405 |       |      |
| VP07           |      |     | -0.87 | 0.09 | 0.78 | 0.04 | 0.70930 | 0.413 |       |      |

|               |      |     |       |      |      |      |         |       |       |      |
|---------------|------|-----|-------|------|------|------|---------|-------|-------|------|
| VP3           |      |     | -0.88 | 0.09 | 0.70 | 0.04 | 0.70929 | 0.407 |       |      |
| VP4           | 27.4 | 0.2 | -0.87 | 0.09 | 0.68 | 0.09 | 0.70929 | 0.399 | 0.10  | 0.03 |
| VP-6          |      |     | -0.80 | 0.09 | 0.75 | 0.02 | 0.70929 | 0.400 |       |      |
| VP8           |      |     |       |      | 0.68 | 0.08 | 0.70929 | 0.399 |       |      |
| Rott1         |      |     | -0.85 | 0.10 | 0.49 | 0.05 | 0.70928 | 0.236 |       |      |
| Rott2         |      |     |       |      | 0.91 | 0.08 | 0.70933 | 0.385 |       |      |
| Rott3         |      |     | -1.51 | 0.17 | 0.53 | 0.08 | 0.70927 | 0.215 |       |      |
| Rott4         | 28.1 | 0.3 | -1.91 | 0.03 | 0.53 | 0.06 | 0.70926 | 0.262 | 0.24  | 0.06 |
| Rott5         | 30.3 | 0.1 | -0.85 | 0.02 | 0.70 | 0.05 | 0.70932 | 0.313 | 0.09  | 0.04 |
| CAL 212       | 18.2 |     | -0.97 | 0.09 | 0.37 | 0.03 | 0.70917 | 0.318 | -0.13 | 0.03 |
| CAL 213       |      |     | -0.92 | 0.12 | 0.52 | 0.06 | 0.70915 | 0.334 | 0.09  | 0.03 |
| CAL 215       | 34.1 |     | -0.86 | 0.09 | 0.75 | 0.05 | 0.70914 | 0.352 |       |      |
| GW 213        | 23.1 | 0.0 | -1.99 | 0.04 | 0.43 | 0.06 | 0.70869 | 0.236 | 0.46  | 0.03 |
| FIC_17        |      |     |       |      |      |      |         |       | 0.24  | 0.04 |
| MEX_11        |      |     |       |      |      |      |         |       | 0.43  |      |
| MEX_63        | 30.1 | 0.1 | -0.78 | 0.05 | 0.93 | 0.11 |         |       | 0.30  |      |
| MEX_66        |      |     |       |      | 0.93 | 0.07 |         |       | 0.30  |      |
| SGD Eilat     | 28.5 | 0.2 |       |      | 0.94 | 0.07 |         |       | 0.49  | 0.03 |
| MB Academy 1  |      |     |       |      | 0.93 | 0.08 |         |       |       |      |
| MB Academy 5  |      |     | -0.79 | 0.09 | 0.95 | 0.09 |         |       |       |      |
| MB Hopkins 10 |      |     | -0.86 | 0.09 | 0.88 | 0.05 | 0.70934 | 0.462 |       |      |
| MB Hopkins 11 | 19.9 | 0.3 | -0.60 | 0.09 | 0.71 | 0.16 | 0.70932 | 0.395 | 0.23  | 0.03 |
| MB Hopkins 15 | 17.1 | 0.1 | -0.91 |      | 0.69 | 0.08 | 0.70935 | 0.447 |       |      |
| MB Hopkins 16 | 31.5 | 0.1 | -0.89 | 0.09 |      |      |         |       |       |      |
| MB Hopkins 18 |      |     | -0.83 | 0.09 |      |      |         |       | 0.39  | 0.03 |
| MB Hopkins 19 |      |     | -0.77 | 0.09 | 0.92 | 0.04 |         |       |       |      |
| MB Hopkins 39 |      |     |       |      | 0.82 | 0.09 |         |       |       |      |
| WP 10-5       | 29.5 | 0.1 |       |      | 0.93 | 0.06 |         |       |       |      |
| WP 12-5       | 30.3 | 0.3 |       |      | 0.91 | 0.04 |         |       |       |      |
| WP 1-5        | 30.7 | 0.3 |       |      | 0.88 | 0.06 | 0.70936 | 0.440 |       |      |
| WP 2-5        | 31.1 | 0.2 |       |      | 0.97 | 0.09 | 0.70936 | 0.477 |       |      |
| WP 3-S        | 30.1 | 0.2 |       |      | 0.86 | 0.09 |         |       | 0.25  | 0.05 |
| WP 5-5        | 30.6 | 0.4 | -1.01 | 0.03 | 0.78 | 0.05 |         |       | 0.04  | 0.05 |
| WP 6-5        | 30.2 | 0.2 | -0.86 | 0.09 | 0.87 | 0.11 |         |       | 0.07  | 0.06 |
| DT1           | 23.6 | 0.1 | -0.95 | 0.09 | 0.57 | 0.08 |         |       | 0.04  | 0.04 |
| DT2           | 49.4 | 0.3 | -0.90 | 0.09 | 0.82 | 0.10 | 0.70934 | 0.411 | -0.28 | 0.03 |
| DT3           | 43.2 | 0.2 | -0.87 | 0.05 | 0.83 | 0.03 | 0.70935 | 0.430 |       |      |
| DT4           | 39.7 | 0.2 | -1.13 | 0.09 | 0.90 | 0.01 |         |       |       |      |
| DT8           | 32.5 | 0.4 | -0.80 | 0.09 | 0.87 | 0.09 |         |       |       |      |
| DT9           | 28.2 | 0.1 | -0.79 | 0.02 | 0.88 | 0.18 |         |       |       |      |
| GSB Ba peak   | 34.4 | 0.1 | -0.85 | 0.09 | 0.93 | 0.04 | 0.70931 | 0.376 | 0.07  | 0.03 |
| GSB Fresh     | 33.3 | 0.0 | -1.23 | 0.03 | 0.49 | 0.04 |         |       | -0.01 | 0.07 |
| GSB Mid       | 30.4 | 0.4 | -0.83 | 0.09 | 0.85 | 0.10 | 0.70933 | 0.413 |       |      |

|                |      |     |       |      |      |      |         |       |       |      |
|----------------|------|-----|-------|------|------|------|---------|-------|-------|------|
| GSB Mid2       | 30.3 | 0.0 | -0.83 | 0.07 | 0.87 | 0.08 | 0.70933 | 0.415 |       |      |
| GSB Saline     | 29.8 | 0.3 | -0.78 | 0.06 | 0.82 | 0.06 | 0.70930 | 0.387 |       |      |
| AK_102         | 29.3 | 0.4 | -0.82 | 0.09 |      |      |         |       |       | 0.28 |
| AK_115         |      |     | -0.82 | 0.09 | 1.05 |      |         |       |       | 0.39 |
| AK_131         |      |     | -0.82 | 0.09 | 0.99 |      |         |       |       | 0.40 |
| AK_15          |      |     | -0.81 | 0.09 | 1.01 |      |         |       |       | 0.37 |
| AK_38          | 30.5 | 0.1 | -0.85 | 0.09 |      |      |         |       |       |      |
| AK_48          | 29.7 | 0.1 | -0.91 | 0.16 | 0.95 |      |         |       |       | 0.30 |
| AK_49          |      |     |       |      |      |      |         |       |       | 0.22 |
| AK_75          |      |     | -0.86 | 0.09 | 0.94 |      | 0.70923 | 0.358 |       | 0.25 |
| <hr/>          |      |     |       |      |      |      |         |       |       |      |
| Aus 1          | 16.9 |     | -0.89 | 0.09 | 0.52 | 0.02 | 0.70927 | 0.270 |       |      |
| Aus 10         | 30.9 | 0.2 | -0.87 | 0.09 | 0.80 | 0.08 |         |       |       |      |
| Aus 11         | 16.6 |     |       |      | 0.67 | 0.06 | 0.70933 | 0.367 |       |      |
| Aus 12         | 16.6 |     | -0.88 | 0.09 | 0.39 | 0.10 | 0.70929 | 0.288 |       |      |
| Aus 13         |      |     | -0.95 | 0.09 | 0.86 | 0.04 | 0.70932 | 0.388 |       |      |
| Aus 14         |      |     |       |      | 0.85 | 0.07 |         |       |       |      |
| Aus 15         | 30.8 | 0.3 | -1.15 | 0.09 | 0.76 | 0.10 | 0.70932 | 0.390 |       |      |
| Aus 16         |      |     | -0.94 | 0.09 |      |      | 0.70929 | 0.298 |       |      |
| Aus 17         |      |     | -0.98 | 0.09 | 0.98 | 0.00 |         |       |       |      |
| Aus 18         |      |     | -0.99 | 0.09 | 0.89 | 0.01 |         |       |       |      |
| Aus 2          |      |     | -0.98 | 0.09 | 0.52 | 0.06 | 0.70929 | 0.340 |       |      |
| Aus 3          | 18.4 | 0.1 | -1.40 | 0.09 | 0.46 | 0.09 | 0.70931 | 0.343 | -0.01 | 0.04 |
| Aus 4          |      |     | -1.19 | 0.09 | 0.41 | 0.01 | 0.70929 | 0.293 |       |      |
| Aus 5          | 30.1 | 0.2 | -0.48 | 0.09 | 0.79 | 0.11 | 0.70931 | 0.391 |       |      |
| Aus 6          |      |     | -1.16 | 0.09 | 0.49 | 0.06 | 0.70927 | 0.275 |       |      |
| Aus 7          | 21.2 | 0.2 | -0.87 | 0.09 | 0.53 | 0.02 | 0.70930 | 0.310 |       |      |
| Aus 8          | 19.3 | 0.2 | -1.13 | 0.09 | 0.75 | 0.05 |         |       |       |      |
| Aus 9          |      |     | -0.83 | 0.09 |      |      | 0.70931 | 0.369 |       |      |
| MB_31          | 30.7 | 0.3 |       |      | 0.93 | 0.03 |         |       |       | 0.26 |
| MB_34          |      |     | -0.81 | 0.09 | 0.87 | 0.06 |         |       |       | 0.28 |
| MB_38          | 31.4 | 0.2 |       |      | 0.85 | 0.09 | 0.70932 | 0.388 |       | 0.36 |
| MB_56          |      |     |       |      | 0.94 | 0.08 |         |       |       | 0.25 |
| MB_78          |      |     | -0.93 | 0.09 | 0.89 | 0.09 | 0.70938 | 0.423 |       | 0.29 |
| S.A. ocn       | 30.6 | 0.2 |       |      | 0.93 | 0.07 | 0.70932 | 0.423 |       |      |
| SA Fresh       | 17.5 | 0.0 | -0.81 | 0.09 | 0.95 | 0.08 |         |       | 0.25  | 0.03 |
| SA SL-EM-#3    | 35.5 | 0.2 | -0.79 | 0.09 | 0.75 | 0.19 | 0.70936 | 0.461 | 0.15  | 0.03 |
| SA SL-EM-#6    | 30.5 | 0.2 | -0.86 | 0.06 | 0.85 | 0.06 | 0.70932 | 0.398 |       |      |
| SFB AI 17 5/10 | 30.3 | 0.4 | -0.84 | 0.09 | 0.85 | 0.07 |         |       |       |      |
| SFB_2          | 30.7 | 0.6 | -0.92 | 0.09 | 0.72 |      | 0.70929 | 0.345 |       | 0.09 |
| SFB_22         |      |     | -0.81 | 0.09 | 0.85 | 0.10 | 0.70928 | 0.365 |       | 0.25 |
| SFB_27         |      |     | -0.83 | 0.09 | 0.95 |      |         |       |       | 0.14 |
| SFB_39         |      |     | -1.00 | 0.09 | 0.88 | 0.07 | 0.70914 |       |       | 0.18 |
| SFB_72         | 31.0 | 0.4 |       |      | 0.83 |      | 0.70914 | 0.391 |       | 0.08 |



|             |      |     |       |      |      |      |         |       |
|-------------|------|-----|-------|------|------|------|---------|-------|
| SFB_85      | 30.0 | 0.2 | -1.00 | 0.02 | 0.84 | 0.11 | 0.70921 | 0.348 |
| SFB17 5/10  |      |     | -0.50 | 0.09 |      |      | 0.70922 | 0.323 |
| SFB361009   |      |     | -0.82 | 0.02 | 0.91 | 0.05 |         |       |
| SFBAI171009 |      |     |       |      | 0.86 | 0.05 |         |       |

---

## **Supplementary References**

1. Beck, A., Charette, M., Cochran, J. K., Gonnee, M. & Peucker-Ehrenbrink, B. Dissolved strontium behavior in the subterranean estuary and implications for the Sr mass balance and isotope budget of the global ocean. *Geochim. Cosmochim. Acta* **117**, 33–52 (2013).
2. Knee, K., Street, J. H., Grossman, E. G. & Paytan, A. Nutrient inputs to the coastal ocean from submarine groundwater discharge in a groundwater-dominated system: Relation to land use (Kona coast, Hawaii, U.S.A.). *Limnol. Oceanogr.* **55**, 1105–1122 (2010).
3. Mayfield, K. K. A summary of the submarine groundwater discharge (SGD) in Kahana Bay: spatial and intra-daily variability. (University of Hawaii at Manoa, 2013).
4. Bishop, J. M., Glenn, C. R., Amato, D. W. & Dulai, H. Effect of land use and groundwater flow path on submarine groundwater discharge nutrient flux. *J. Hydrol. Reg. Stud.* **11**, 194–218 (2017).
5. Knee, K. L., Crook, E. D., Hench, J. L., Leichter, J. J. & Paytan, A. Assessment of Submarine Groundwater Discharge (SGD) as a Source of Dissolved Radium and Nutrients to Moorea (French Polynesia) Coastal Waters. *Estuaries and Coasts* **39**, 1651–1668 (2016).
6. Povinec, P. P. *et al.* Isotopic, geophysical and biogeochemical investigation of submarine groundwater discharge: IAEA-UNESCO intercomparison exercise at Mauritius Island. *J. Environ. Radioact.* **104**, 24–45 (2012).
7. Null, K. A., Knee, K. L., Crook, E. D. & Sieyes, N. R. De. Composition and fluxes of submarine groundwater along the Caribbean coast of the Yucatan Peninsula. *Coast. Shelf Res.* **77**, 38–50 (2014).
8. Liu, Q. *et al.* Carbonate system biogeochemistry in a subterranean estuary: Waquoit Bay, USA. *Geochim. Cosmochim. Acta* **203**, 422–439 (2017).
9. Bryan, E., Meredith, K. T., Baker, A., Post, V. E. A. & Andersen, M. S. Island groundwater resources, impacts of abstraction and a drying climate: Rottneest Island, Western Australia. *J. Hydrol.* **542**, 704–718

- (2016).
10. Rapaglia, J. *et al.* Investigation of residence time and groundwater flux in Venice Lagoon: Comparing radium isotope and hydrodynamical models. *J. Environ. Radioact.* **101**, 571–581 (2010).
  11. Holmden, C., Papanastassiou, D. A., Blanchon, P. & Evans, S.  $\delta^{44/40}\text{Ca}$  variability in shallow water carbonates and the impact of submarine groundwater discharge on Ca-cycling in marine environments. *Geochim. Cosmochim. Acta* **83**, 179–194 (2012).
  12. Beck, A. J., Rapaglia, J. P., Cochran, J. K., Bokuniewicz, H. J. & Yang, S. Submarine groundwater discharge to Great South Bay, NY, estimated using Ra isotopes. *Mar. Chem.* **109**, 279–291 (2008).
  13. Lecher, A. L., Fisher, A. T. & Paytan, A. Submarine groundwater discharge in Northern Monterey Bay, California: Evaluation by mixing and mass balance models. *Mar. Chem.* **179**, 44–55 (2016).
  14. Lecher, A. L. *et al.* Methane transport through submarine groundwater discharge to the North Pacific and Arctic Ocean at two Alaskan sites. *Limnol. Oceanogr.* **61**, S344–S355 (2016).
  15. Hogan, J. F. & Blum, J. D. Boron and lithium isotopes as groundwater tracers: A study at the Fresh Kills landfill, Staten Island, New York, USA. *Appl. Geochemistry* **18**, 615–627 (2003).
  16. Null, K. A. *et al.* Submarine Groundwater Discharge-Derived Nutrient Loads to San Francisco Bay: Implications to Future Ecosystem Changes. *Estuaries and Coasts* **35**, 1299–1315 (2012).
  17. Moore, W. S., Humphries, M. S., Benitez-Nelson, C. R., Pillay, L. & Higgs, C. Transport of Radium and Nutrients Through Eastern South African Beaches. *J. Geophys. Res. Ocean.* **124**, 2010–2027 (2019).
  18. Tucker, J. P., Santos, I. R., Davis, K. L. & Butcher, P. A. Whale carcass leachate plumes in beach groundwater: A potential shark attractant to the surf? *Mar. Pollut. Bull.* **140**, 219–226 (2019).
  19. Windom, H. & Niencheski, F. Biogeochemical processes in a freshwater-seawater mixing zone in permeable sediments along the coast of Southern Brazil. *Mar. Chem.* **83**, 121–130 (2003).
  20. Magna, T., Wiechert, H. & Halliday, A. Low-blank isotope ratio measurement of small samples of lithium using multiple-collector ICPMS. *Int. J. Mass Spectrom.* **239**, 67–76 (2004).
  21. Flesch, G. D., Anderson, A. R. & Svec, H. J. A secondary isotopic standard for  $^6\text{Li}/^7\text{Li}$  determinations. *Int. J. Mass Spectrom. Ion Phys.* **12**, 265–272 (1973).
  22. Jochum, K. P. *et al.* GeoReM: A New Geochemical Database for Reference Materials and Isotopic Standards. *Geostand. Geoanalytical Res.* **29**, 333–338 (2005).

23. Blättler, C. L., Miller, N. R. & Higgins, J. A. Mg and Ca isotope signatures of authigenic dolomite in siliceous deep-sea sediments. *Earth Planet. Sci. Lett.* **419**, 32–42 (2015).
24. Galy, A. *et al.* Magnesium isotope heterogeneity of the isotopic standard SRM980 and new reference materials for magnesium-isotope-ratio measurements. *J. Anal. At. Spectrom.* **18**, 1352–1356 (2003).
25. Higgins, J. A. & Schrag, D. P. Constraining magnesium cycling in marine sediments using magnesium isotopes. *Geochim. Cosmochim. Acta* **74**, 5039–5053 (2010).
26. Romaniello, S. J. *et al.* Fully automated chromatographic purification of Sr and Ca for isotopic analysis. *J. Anal. At. Spectrom.* **30**, 1906 (2015)
27. Eisenhauer, A. *et al.* Calcium isotope ratios in blood and urine: A new biomarker for the diagnosis of osteoporosis. *Bone Reports* **10**, 100200 (2019).
28. Coplen, T. B. *et al.* Compilation of minimum and maximum isotope ratios of selected elements in naturally occurring terrestrial materials and reagents. *U.S. Dep. Inter. U.S. Geol. Surv. Water-Resources Investig. Rep.* **01-4222**, 1–76 (2002).
29. Gussone, N. *et al.* *Calcium Stable Isotope Geochemistry. Advances in Isotope Geochemistry* (Springer, 2016).
30. Krabbenhöft, A. *et al.* Determination of radiogenic and stable strontium isotope ratios ( $^{87}\text{Sr}/^{86}\text{Sr}$ ;  $\delta^{88/86}\text{Sr}$ ) by thermal ionization mass spectrometry applying an  $^{87}\text{Sr}/^{84}\text{Sr}$  double spike. (2009).
31. Bates, S. L. *et al.* Barium isotopes reveal role of ocean circulation on barium cycling in the Atlantic. *Geochim. Cosmochim. Acta* **204**, 286–299 (2017).
32. Luijendijk, E., Gleeson, T. & Moosdorf, N. Fresh groundwater discharge insignificant for the world's oceans but important for coastal ecosystems. *Nature Communications* **11** (1), 1–12 (2020).
33. Zhou, Y., Sawyer, A. H., David, C. H. & Famiglietti, J. S. Fresh submarine groundwater discharge to the near-global coast. *Geophys. Res. Lett.* **46**, 1–9 (2019).
34. Zektser, I. S. *Groundwater as a component of the environment*. (Springer, 2006).
35. Gibbs, M. T. & Kump, L. R. Global chemical erosion during the Last Glacial Maximum and the present: Sensitivity to changes in lithology and hydrology. *Paleoceanography* **9**, 529–543 (1994).
36. Hartmann, J. & Moosdorf, N. The new global lithological map database GLiM: A representation of rock properties at the Earth surface. *Geochemistry, Geophys. Geosystems* **13**, (2012).
